# Supplementary material for: A low-cost liquid crystal display (LCD)-printed microfluidic device: fabrication and application in the biodegradation of petroleum hydrocarbons in petroleum refinery sludge
Source: Royal Society of Chemistry journal article supplement (doi:10.1039/d5ra06174a), 2026-05-07
Supplement: d5ra06174a1.pdf [file d5ra06174a1.pdf]

## Supporting Information

### Low Cost Liquid Crystal Display (LCD) Printed Microfluidic Device: Fabrication and its Application towards Biodegradation of Petroleum Hydrocarbons in Petroleum Refinery Sludge

Amlan Ashish<sup>1,2,†</sup>, Ankita Debnath<sup>3,†</sup>, Poulomi Biswas<sup>1</sup>, Ramkrishna Sen<sup>3</sup>, Gorachand Dutta<sup>1,\*</sup>

<sup>1</sup>NanoBiosensors and Biodevices Lab, School of Medical Sciences and Technology, Indian Institute of Technology Kharagpur, Kharagpur-721302, India.

<sup>2</sup>Advanced Technology Development Centre (ATDC), Indian Institute of Technology Kharagpur, Kharagpur-721302, India.

<sup>3</sup>Department of Bioscience and Biotechnology, Institute of Technology Kharagpur, Kharagpur-721302, India.

† These authors contributed equally to the work

\*Corresponding author: g.dutta@smst.iitkgp.ac.in

**Table S1.** Roughness factors of bare and biofilm coated 3D-printed carrier surface from atomic force microscopic topographic analysis.

| SN | Topography           | S <sub>q</sub> | Sp    | S <sub>v</sub> | S <sub>z</sub> | S <sub>a</sub> |
|----|----------------------|----------------|-------|----------------|----------------|----------------|
| 1  | Bare                 | 0.0933         | 0.249 | 0.323          | 0.572          | 0.0749         |
| 2  | 7 <sup>th</sup> Day  | 0.0349         | 0.158 | 0.190          | 0.347          | 0.0260         |
| 3  | 15 <sup>th</sup> Day | 0.0885         | 0.275 | 0.304          | 0.580          | 0.0689         |
| 4  | 22 <sup>nd</sup> Day | 0.162          | 0.453 | 0.584          | 1.04           | 0.129          |

S<sub>q</sub>: Root mean square height, Sp: Maximum peak height, S<sub>v</sub>: Maximum pit height, S<sub>z</sub>: Maximum height, S<sub>a</sub>: Arithmetic mean height.

| Sample    | Mean RMS ± SD | Mean RMS ± SD |
|-----------|---------------|---------------|
| Untreated | 97.33 ± 4.51  | 97.33 ± 2.60  |
| 3 days    | 33.33 ± 3.06  | 33.33 ± 1.77  |

|         |               |               |
|---------|---------------|---------------|
| 7 days  | 87.00 ± 4.36  | 87.00 ± 2.52  |
| 15 days | 157.33 ± 4.51 | 157.33 ± 2.60 |

24

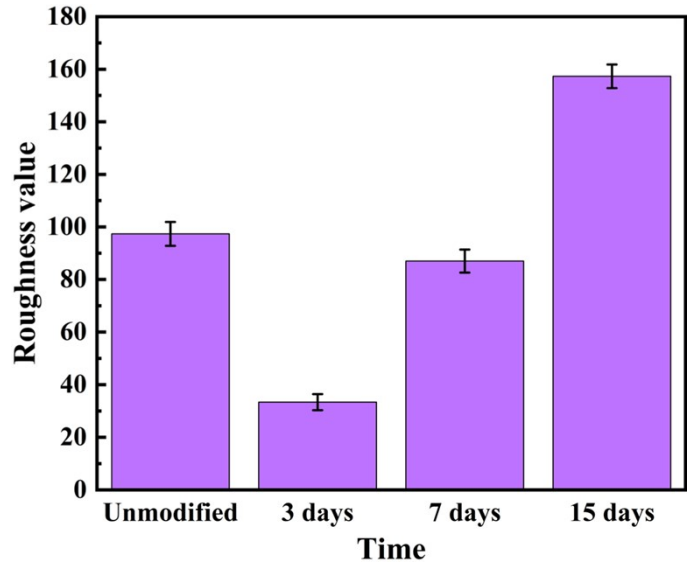

25

26 Figure S1. Deviation of RMS values of the biofilm coated microchannels over a period of 15  
27 days.

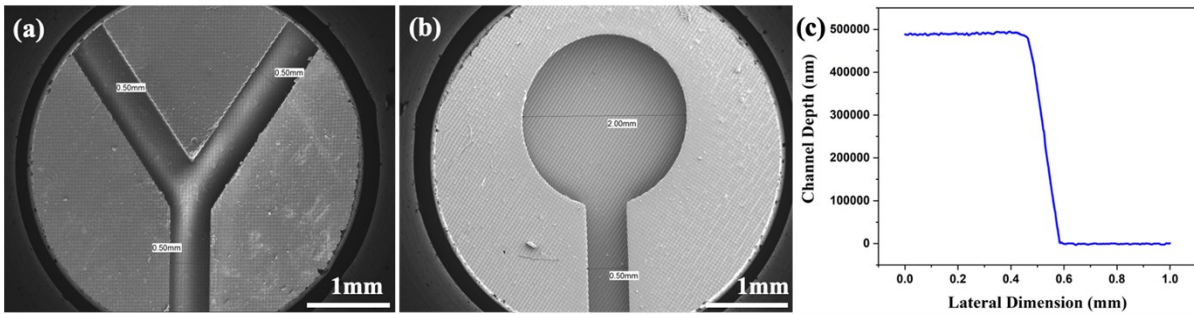

28

29 **Fig.S2.** Dimensional analysis of microchannel (a) SEM image of y cross-section, (b) SEM  
30 image of inlet and (c) channel depth measurement using profilometry.

31 **Table S2.** Mechanical characterization of the 3D-printed sample

| Sample  | Stress (MPa) | Strain (%) | Modulus (MPa)<br>[Take 0.01-0.5 %] | Toughness<br>(MJ/m <sup>3</sup> ) |
|---------|--------------|------------|------------------------------------|-----------------------------------|
| Uncured | 5.07         | 6.01       | 156.4                              | 0.18                              |
| 1 min   | 9.04         | 6.48       | 323.5                              | 0.38                              |
| 5 min   | 18.57        | 4.08       | 1065.3                             | 0.52                              |
| 10 min  | 21.63        | 3.24       | 1298.9                             | 0.45                              |

32

| Sample | Mean Stress ± SD | Mean Stress ± SD |
|--------|------------------|------------------|
|--------|------------------|------------------|

|           |              |              |
|-----------|--------------|--------------|
| Untreated | 4.99 ± 0.31  | 4.99 ± 0.18  |
| 1 min     | 9.25 ± 0.86  | 9.25 ± 0.50  |
| 5 min     | 17.56 ± 1.16 | 17.56 ± 1.16 |
| 10 min    | 21.47 ± 1.03 | 21.47 ± 0.60 |

33

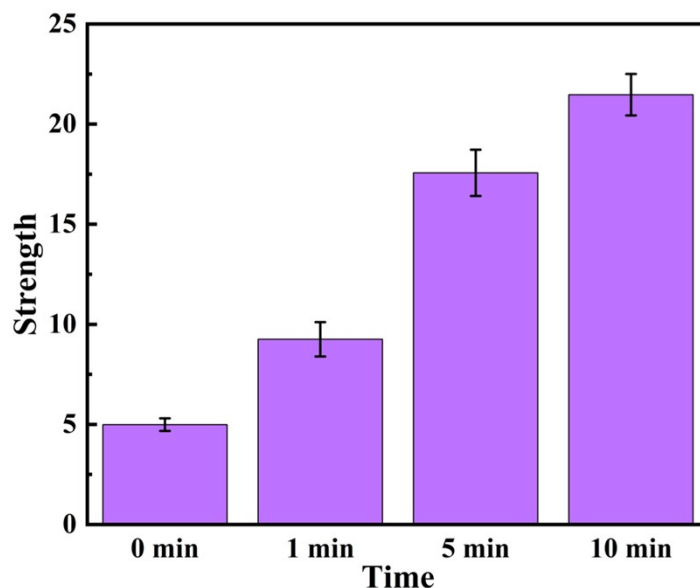

34

35 **Fig. S3.** Deviation in the mechanical strength of the 3D-printed samples.

36 **Table S3.** GC MS spectrum analysis of hydrocarbon degradation of control sample

| PEAK NO. | COMPOUND NAME                        | Mol. Wt. |
|----------|--------------------------------------|----------|
| 1        | HEPTACOSANE                          | 414      |
| 2        | CARBONIC ACID, OCTADECYL VINYL ESTER | 340      |
| 3        | TETRAPENTACONTANE, 1,54-DIBROMO-     | 914      |
| 4        | 1-DODECANOL,                         | 298      |
| 5        | BENZENE, 1,3-BIS(1,1-DIMETHYLETHYL)- | 190      |
| 6        | OCTADECANE, 1-CHLORO-                | 288      |
| 7        | 1-DECANOL, 2-HEXYL-                  | 242      |
| 8        | 1-DODECANOL, 2-HEXYL-                | 270      |
| 9        | TRITETRACONTANE                      | 604      |

|    |                                    |     |
|----|------------------------------------|-----|
| 10 | BEHENYL CHLORIDE                   | 344 |
| 11 | OCTATRIACONTANE, 1,38-DIBROMO-     | 690 |
| 12 | TRIACONTANE, 1,30-DIBROMO-         | 578 |
| 13 | 1-CHLOROEICOSANE                   | 316 |
| 14 | OCTACOSYL TRIFLUOROACETATE         | 506 |
| 15 | 17-PENTATRIACONTENE                | 490 |
| 16 | 2-METHYLHEXACOSANE                 | 380 |
| 17 | TRIACONTANE, 11,20-DIDECYL-        | 702 |
| 18 | HEXACOSYL<br>PENTAFLUOROPROPIONATE | 528 |
| 19 | 1-DECANOL, 2-OCTYL-                | 298 |
| 20 | 1-DECANOL, 2-HEXYL-                | 242 |
| 21 | 1-DECANOL, 2-HEXYL-                | 242 |
| 22 | PIPERZINE                          | 86  |

37

38 **Table S4.** GC MS spectrum analysis of hydrocarbon degradation after 3 days

| <b>PEAK NO.</b> | <b>COMPOUND NAME</b>                                                 | <b>Mol. Wt.</b> |
|-----------------|----------------------------------------------------------------------|-----------------|
| 1               | HEXADECANE, 2,6,10,14-TETRAMETHYL-                                   | 282             |
| 2               | NONADECANE, 9-METHYL-                                                | 282             |
| 3               | HEXADECANE, 2,6,11,15-TETRAMETHYL-                                   | 282             |
| 4               | HEPTADECANE, 7-METHYL-                                               | 254             |
| 5               | PIPERAZINE, 2-METHYL                                                 | 100             |
| 6               | BENZENE, 1,3-BIS(1,1-DIMETHYLETHYL)-                                 | 190             |
| 7               | 3,7,11,15-TRIMETHYLHEXADECANOIC<br>ACID, 2,2,2- TRIFLUOROETHYL ESTER | 394             |
| 8               | ETHER, DODECYL ISOPROPYL                                             | 228             |
| 9               | 3,5-DIMETHYLDODECANE                                                 | 198             |
| 10              | UNDECANE, 5-ETHYL-5-PROPYL-                                          | 226             |
| 11              | OCT-3-ENOYLAMIDE, N-METHYL-N-(2-<br>ETHYLHEXYL)-                     | 267             |

|    |                         |     |
|----|-------------------------|-----|
| 12 | 11-METHYLHENTRIACONTANE | 450 |
| 13 | TETRACOSANE             | 338 |
| 14 | HENEICOSANE             | 296 |
| 15 | ALLYL UNDECANOATE       | 226 |
| 16 | 5-ETHYLHEPTADECANE      | 268 |

39

40 **Table S5.** GC MS spectrum analysis of hydrocarbon degradation after 15 days

| <b>PEAK NO.</b> | <b>COMPOUND NAME</b>                        | <b>Mol. Wt.</b> |
|-----------------|---------------------------------------------|-----------------|
| 1               | PIPERAZINE                                  | 86              |
| 2               | 3,5-DIMETHYLDODECANE                        | 198             |
| 3               | OCT-3-ENOYLAMIDE, N-METHYL-N-<br>HEXADECYL- | 379             |
| 4               | EICOSANE, 1-iodo-                           | 408             |
| 5               | DECANE, 2,3,7-TRIMETHYL-                    | 184             |
| 6               | 2-BROMOTETRADECANE                          | 276             |

41

42
